# Supplementary material for: Sustainable versatile chitin aerogels: facile synthesis, structural control and high-efficiency acoustic absorption
Source: Royal Society of Chemistry journal article supplement (doi:10.1039/d4ra03687e), 2024-01-01
Supplement: d4ra03687e1.pdf [file d4ra03687e1.pdf]

## Supplementary Information

# **Sustainable versatile chitin aerogels: Facile synthesis, structural control and high-efficiency acoustic absorption**

Jun-Nan Wan,<sup>a</sup> Ju-Qi Ruan,<sup>\*a,b</sup> Qing-Yuan Chen,<sup>a</sup> Jian-Cheng Jiang,<sup>a</sup> Wei Guo,<sup>a</sup> Xiaoqing Zuo,<sup>c</sup> Chunlong Fei<sup>d</sup> and Shanshan Yao<sup>\*b</sup>

<sup>a</sup> School of Physics Science and Technology, Kunming University, Kunming 650214, PR China

<sup>b</sup> School of Materials Science and Engineering, Jiangsu University, Zhenjiang 212013, PR China

<sup>c</sup> Faculty of Materials Science and Engineering, Kunming University of Science and Technology, Kunming 650093, PR China

<sup>d</sup> School of Microelectronics, Xidian University, Xi'an 710126, PR China

Address correspondence to E-mail: ruanjuqi@foxmail.com; yaosshan@ujs.edu.cn

**This file includes:**

**Supplementary Figure S1 to S3**

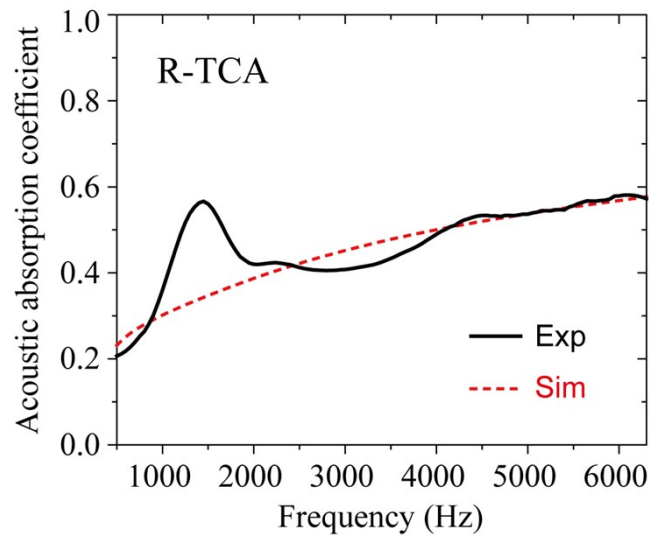

**Fig. S1** Acoustic absorption performance of R-TCA. Exp represents the experimental result, and Sim is the simulated result obtained from the three-parameter JCAL model. Standard deviation of the most probable aperture is 0.60.

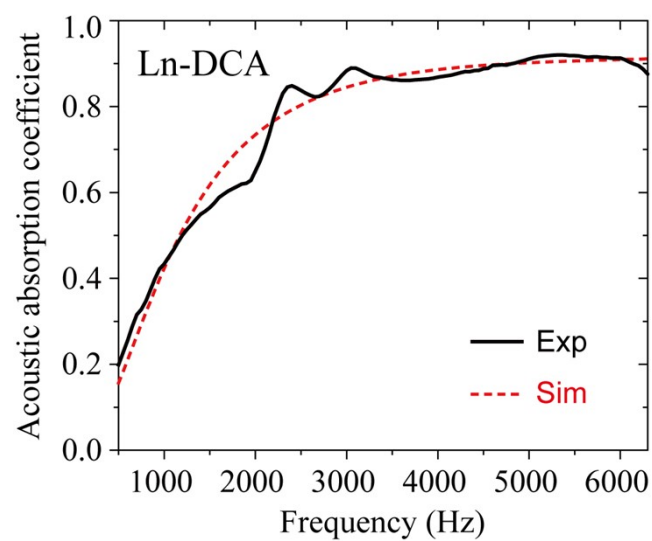

**Fig. S2** Acoustic absorption performance of Ln-DCA. Exp represents the experimental

result, and Sim is the simulated result obtained from the three-parameter JCAL model.

Standard deviation of the most probable aperture is 0.29.

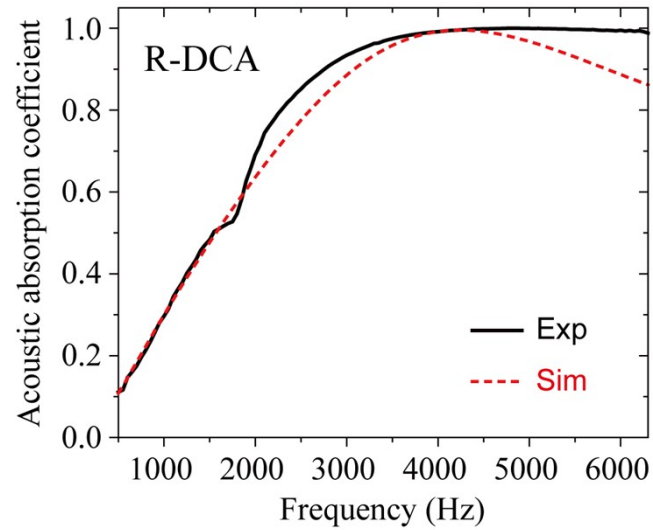

**Fig. S3** Acoustic absorption performance of R-DCA. Exp represents the experimental result, and Sim is the simulated result obtained from the three-parameter JCAL model.

Standard deviation of the most probable aperture is 0.52.
